# Supplementary material for: Prognostic significance of laterality in lung neuroendocrine tumors
Source: Springer Nature journal article supplement (doi:10.1007/s12020-022-03015-w), 2022-03-18

## **Supplementary Materials**

### **New prognostic frontiers for lung neuroendocrine tumors**

**Anna La Salvia**<sup>1</sup>, Irene Persano<sup>2</sup>, Alessandra Siciliani<sup>3</sup>, Monica Verrico<sup>4</sup>, Massimiliano Bassi<sup>5</sup>, Roberta Modica<sup>6</sup>, Alessandro Audisio<sup>2</sup>, Isabella Zanata<sup>7</sup>, Beatrice Trabalza Marinucci<sup>3</sup>, Elena Trevisi<sup>2</sup>, Giulia Puliani<sup>8,9</sup>, Maria Rinzivillo<sup>10</sup>, Elena Parlagreco<sup>2</sup>, Roberto Baldelli<sup>11</sup>, Tiziana Feola<sup>9,12</sup>, Franz Sesti<sup>9</sup>, Paola Razzore<sup>13</sup>, Rossella Mazzilli<sup>14</sup>, Massimiliano Mancini<sup>15</sup>, Francesco Panzuto<sup>10</sup>, Marco Volante<sup>16</sup>, Elisa Giannetta<sup>9</sup>, Carmen Romero<sup>17</sup>, Marialuisa Appetecchia<sup>8</sup>, Andrea Isidori<sup>9</sup>, Federico Venuta<sup>5</sup>, Maria Rosaria Ambrosio<sup>7</sup>, Maria Chiara Zatelli<sup>7</sup>, Mohsen Ibrahim<sup>3</sup>, Annamaria Colao<sup>6</sup>, Maria Pia Brizzi<sup>2</sup>, Rocío García-Carbonero<sup>1</sup>, Antongiulio Faggiano<sup>14</sup>.

1. Department of Oncology, 12 de Octubre University Hospital, Madrid, Spain.
2. Department of Oncology, San Luigi Gonzaga Hospital, Orbassano, Italy.
3. Department of Thoracic Surgery, Sant'Andrea University Hospital, Rome, Italy.
4. Department of Radiological, Oncological and Pathological Sciences, Sapienza University of Rome, Rome, Italy.
5. Department of Thoracic Surgery, Policlinico Umberto I, "Sapienza" University of Rome, Italy.
6. Department of Clinical Medicine and Surgery, University of Naples Federico II, Naples, Italy.
7. Department of Medical Sciences, Section of Endocrinology and Internal Medicine, University of Ferrara, Ferrara, Italy.
8. Oncological Endocrinology Unit, Regina Elena National Cancer Institute, Rome, Italy.
9. Department of Experimental Medicine, "Sapienza" University of Roma, Italy.
10. Digestive Disease Unit, ENETS Center of Excellence, Sant'Andrea University Hospital, Rome, Italy.
11. Endocrinology Unit, Department of Oncology and Medical Specialities, A.O. San Camillo-Forlanini, Rome, Italy.
12. Neuroendocrinology, Neuromed Institute, IRCCS, Pozzilli, Italy.
13. Endocrinology Unit, Mauriziano Hospital, Turin, Italy.
14. Endocrinology Unit, Department of Clinical and Molecular Medicine, Sant'Andrea Hospital, Sapienza University of Rome, ENETS Center of Excellence, Rome, Italy.
15. Division of Morphologic and Molecular, S. Andrea Hospital, Rome, Italy.
16. Department of Oncology, Pathology Unit of San Luigi Hospital, University of Turin, Orbassano, Turin, Italy.
17. Scientific support, 12 de Octubre University Hospital, Madrid, Spain.

**Short title:** New prognostic frontiers for lung N

#### **Corresponding author**

Anna La Salvia  
Department of Oncology, 12 de Octubre University Hospital  
Avenida de Cordoba, s/n, 28041, Madrid, Spain  
Telephone: +34 602485105  
Email: [alasalvi@ucm.es](mailto:alasalvi@ucm.es)

**Supplementary results. Associations with age, peripheral versus central location of the primary tumor and necrosis**

**1. AGE**

**Case Processing Summary**

|                                                                | Cases |         |         |         |       |         |
|----------------------------------------------------------------|-------|---------|---------|---------|-------|---------|
|                                                                | Valid |         | Missing |         | Total |         |
|                                                                | N     | Percent | N       | Percent | N     | Percent |
| Age * Smoke yes 1 no 0                                         | 165   | 55,0%   | 135     | 45,0%   | 300   | 100,0%  |
| Age* Central 1 vs Periferic 0 primary lesion                   | 200   | 66,7%   | 100     | 33,3%   | 300   | 100,0%  |
| Age * 18 FDG PET scan Not done Positive 1 Negative 0           | 103   | 34,3%   | 197     | 65,7%   | 300   | 100,0%  |
| Age* Octreoscan/68GalliumPET Not done NA Positive 1 Negative 0 | 63    | 21,0%   | 237     | 79,0%   | 300   | 100,0%  |
| Age * Tcat                                                     | 192   | 64,0%   | 108     | 36,0%   | 300   | 100,0%  |
| Age * Npos1neg0                                                | 190   | 63,3%   | 110     | 36,7%   | 300   | 100,0%  |
| Age * Stage                                                    | 196   | 65,3%   | 104     | 34,7%   | 300   | 100,0%  |
| Age * Ki67                                                     | 165   | 55,0%   | 135     | 45,0%   | 300   | 100,0%  |
| Age* Necrosis Not done NA Positive 1 Negative 0                | 199   | 66,3%   | 101     | 33,7%   | 300   | 100,0%  |
| Age* Diagnosis Typical carcinoid 0 Atypical carcinoid 1        | 200   | 66,7%   | 100     | 33,3%   | 300   | 100,0%  |
| Age * Typesurgery                                              | 178   | 59,3%   | 122     | 40,7%   | 300   | 100,0%  |

**Count**

|       |        | Smoke yes 1 no 0 |    | Total |
|-------|--------|------------------|----|-------|
|       |        | 0                | 1  |       |
| Age   | <= MED | 47               | 37 | 84    |
|       | >MED   | 55               | 26 | 81    |
| Total |        | 102              | 63 | 165   |

### Chi-Square Tests

|                                    | Value              | df | Asymptotic Significance (2-sided) | Exact Sig. (2-sided) | Exact Sig. (1-sided) |
|------------------------------------|--------------------|----|-----------------------------------|----------------------|----------------------|
| Pearson Chi-Square                 | 2,494 <sup>a</sup> | 1  | 0,114                             |                      |                      |
| Continuity Correction <sup>b</sup> | 2,014              | 1  | 0,156                             |                      |                      |
| Likelihood Ratio                   | 2,504              | 1  | 0,114                             |                      |                      |
| Fisher's Exact Test                |                    |    |                                   | 0,149                | 0,078                |
| Linear-by-Linear Association       | 2,479              | 1  | 0,115                             |                      |                      |
| N of Valid Cases                   | 165                |    |                                   |                      |                      |

a. 0 cells (0,0%) have expected count less than 5. The minimum expected count is 30,93.

b. Computed only for a 2x2 table

### Crosstab

#### Count

|       |         | Central 1 vs Periferic 0 primary lesion |     |       |
|-------|---------|-----------------------------------------|-----|-------|
|       |         | 0                                       | 1   | Total |
| Age   | < = MED | 27                                      | 76  | 103   |
|       | >MED    | 44                                      | 53  | 97    |
| Total |         | 71                                      | 129 | 200   |

### Chi-Square Tests

|                                    | Value              | df | Asymptotic Significance (2-sided) | Exact Sig. (2-sided) | Exact Sig. (1-sided) |
|------------------------------------|--------------------|----|-----------------------------------|----------------------|----------------------|
| Pearson Chi-Square                 | 7,998 <sup>a</sup> | 1  | 0,005                             |                      |                      |
| Continuity Correction <sup>b</sup> | 7,184              | 1  | 0,007                             |                      |                      |
| Likelihood Ratio                   | 8,053              | 1  | 0,005                             |                      |                      |
| Fisher's Exact Test                |                    |    |                                   | 0,005                | 0,004                |
| Linear-by-Linear Association       | 7,958              | 1  | 0,005                             |                      |                      |
| N of Valid Cases                   | 200                |    |                                   |                      |                      |

a. 0 cells (0,0%) have expected count less than 5. The minimum expected count is 34,43.

b. Computed only for a 2x2 table

Crosstab

Count

|       |         | 18 FDG PET scan Not done Positive<br>1 Negative 0 |    |       |
|-------|---------|---------------------------------------------------|----|-------|
|       |         | 0                                                 | 1  | Total |
| Age   | < = MED | 12                                                | 36 | 48    |
|       | >MED    | 14                                                | 41 | 55    |
| Total |         | 26                                                | 77 | 103   |

Chi-Square Tests

|                                    | Value              | df | Asymptotic<br>Significance (2-<br>sided) | Exact Sig. (2-<br>sided) | Exact Sig. (1-<br>sided) |
|------------------------------------|--------------------|----|------------------------------------------|--------------------------|--------------------------|
| Pearson Chi-Square                 | 0,003 <sup>a</sup> | 1  | 0,958                                    |                          |                          |
| Continuity Correction <sup>b</sup> | 0,000              | 1  | 1,000                                    |                          |                          |
| Likelihood Ratio                   | 0,003              | 1  | 0,958                                    |                          |                          |
| Fisher's Exact Test                |                    |    |                                          | 1,000                    | 0,570                    |
| Linear-by-Linear Association       | 0,003              | 1  | 0,958                                    |                          |                          |
| N of Valid Cases                   | 103                |    |                                          |                          |                          |

a. 0 cells (0,0%) have expected count less than 5. The minimum expected count is 12,12.

b. Computed only for a 2x2 table

Crosstab

Count

|       |         | Octreoscan/68GalliumPET Not done<br>NA Positive 1 Negative 0 |    |       |
|-------|---------|--------------------------------------------------------------|----|-------|
|       |         | 0                                                            | 1  | Total |
| Age   | < = MED | 14                                                           | 24 | 38    |
|       | >MED    | 8                                                            | 17 | 25    |
| Total |         | 22                                                           | 41 | 63    |

### Chi-Square Tests

|                                    | Value              | df | Asymptotic<br>Significance (2-<br>sided) | Exact Sig. (2-<br>sided) | Exact Sig. (1-<br>sided) |
|------------------------------------|--------------------|----|------------------------------------------|--------------------------|--------------------------|
| Pearson Chi-Square                 | 0,156 <sup>a</sup> | 1  | 0,693                                    |                          |                          |
| Continuity Correction <sup>b</sup> | 0,015              | 1  | 0,901                                    |                          |                          |
| Likelihood Ratio                   | 0,156              | 1  | 0,693                                    |                          |                          |
| Fisher's Exact Test                |                    |    |                                          | 0,790                    | 0,453                    |
| Linear-by-Linear Association       | 0,153              | 1  | 0,696                                    |                          |                          |
| N of Valid Cases                   | 63                 |    |                                          |                          |                          |

a. 0 cells (0,0%) have expected count less than 5. The minimum expected count is 8,73.

b. Computed only for a 2x2 table

### Crosstab

#### Count

|       |         | Tcat |    |    |   |       |
|-------|---------|------|----|----|---|-------|
|       |         | 1    | 2  | 3  | 4 | Total |
| Age   | < = MED | 53   | 33 | 10 | 3 | 99    |
|       | >MED    | 63   | 23 | 4  | 3 | 93    |
| Total |         | 116  | 56 | 14 | 6 | 192   |

### Chi-Square Tests

|                              | Value              | df | Asymptotic<br>Significance (2-<br>sided) |
|------------------------------|--------------------|----|------------------------------------------|
| Pearson Chi-Square           | 5,037 <sup>a</sup> | 3  | 0,169                                    |
| Likelihood Ratio             | 5,128              | 3  | 0,163                                    |
| Linear-by-Linear Association | 3,152              | 1  | 0,076                                    |
| N of Valid Cases             | 192                |    |                                          |

a. 2 cells (25,0%) have expected count less than 5. The minimum expected count is 2,91.

**Crosstab**

**Count**

|       |         | NposIneg0 |    |       |
|-------|---------|-----------|----|-------|
|       |         | 0         | 1  | Total |
| Age   | < = MED | 68        | 31 | 99    |
|       | >MED    | 72        | 19 | 91    |
| Total |         | 140       | 50 | 190   |

**Chi-Square Tests**

|                                    | Value              | df | Asymptotic Significance (2-sided) | Exact Sig. (2-sided) | Exact Sig. (1-sided) |
|------------------------------------|--------------------|----|-----------------------------------|----------------------|----------------------|
| Pearson Chi-Square                 | 2,662 <sup>a</sup> | 1  | 0,103                             |                      |                      |
| Continuity Correction <sup>b</sup> | 2,151              | 1  | 0,142                             |                      |                      |
| Likelihood Ratio                   | 2,686              | 1  | 0,101                             |                      |                      |
| Fisher's Exact Test                |                    |    |                                   | 0,137                | 0,071                |
| Linear-by-Linear Association       | 2,648              | 1  | 0,104                             |                      |                      |
| N of Valid Cases                   | 190                |    |                                   |                      |                      |

a. 0 cells (0,0%) have expected count less than 5. The minimum expected count is 23,95.

b. Computed only for a 2x2 table

**Crosstab**

**Count**

|       |         | Stage |    |    |    |       |
|-------|---------|-------|----|----|----|-------|
|       |         | 1     | 2  | 3  | 4  | Total |
| Age   | < = MED | 51    | 33 | 8  | 7  | 99    |
|       | >MED    | 60    | 23 | 9  | 5  | 97    |
| Total |         | 111   | 56 | 17 | 12 | 196   |

### Chi-Square Tests

|                              | Value              | df | Asymptotic Significance (2-sided) |
|------------------------------|--------------------|----|-----------------------------------|
| Pearson Chi-Square           | 2,887 <sup>a</sup> | 3  | 0,409                             |
| Likelihood Ratio             | 2,899              | 3  | 0,407                             |
| Linear-by-Linear Association | 1,065              | 1  | 0,302                             |
| N of Valid Cases             | 196                |    |                                   |

a. 0 cells (0,0%) have expected count less than 5. The minimum expected count is 5,94.

### Crosstab

#### Count

|       |         | Ki67 |    |   | Total |
|-------|---------|------|----|---|-------|
|       |         | 1    | 2  | 3 |       |
| Age   | < = MED | 49   | 35 | 4 | 88    |
|       | >MED    | 34   | 39 | 4 | 77    |
| Total |         | 83   | 74 | 8 | 165   |

### Chi-Square Tests

|                              | Value              | df | Asymptotic Significance (2-sided) |
|------------------------------|--------------------|----|-----------------------------------|
| Pearson Chi-Square           | 2,204 <sup>a</sup> | 2  | 0,332                             |
| Likelihood Ratio             | 2,208              | 2  | 0,332                             |
| Linear-by-Linear Association | 1,754              | 1  | 0,185                             |
| N of Valid Cases             | 165                |    |                                   |

a. 2 cells (33,3%) have expected count less than 5. The minimum expected count is 3,73.

Crosstab

Count

|       |         | Necrosis Not done NA Positive 1<br>Negative 0 |    | Total |
|-------|---------|-----------------------------------------------|----|-------|
|       |         | 0                                             | 1  |       |
| Age   | < = MED | 83                                            | 20 | 103   |
|       | >MED    | 82                                            | 14 | 96    |
| Total |         | 165                                           | 34 | 199   |

Chi-Square Tests

|                                    | Value              | df | Asymptotic<br>Significance (2-<br>sided) | Exact Sig. (2-<br>sided) | Exact Sig. (1-<br>sided) |
|------------------------------------|--------------------|----|------------------------------------------|--------------------------|--------------------------|
| Pearson Chi-Square                 | 0,820 <sup>a</sup> | 1  | 0,365                                    |                          |                          |
| Continuity Correction <sup>b</sup> | 0,514              | 1  | 0,473                                    |                          |                          |
| Likelihood Ratio                   | 0,824              | 1  | 0,364                                    |                          |                          |
| Fisher's Exact Test                |                    |    |                                          | 0,452                    | 0,237                    |
| Linear-by-Linear Association       | 0,816              | 1  | 0,366                                    |                          |                          |
| N of Valid Cases                   | 199                |    |                                          |                          |                          |

a. 0 cells (0,0%) have expected count less than 5. The minimum expected count is 16,40.

b. Computed only for a 2x2 table

Crosstab

Count

|       |         | Diagnosis Typical carcinoid 0<br>Atypical carcinoid 1 |    | Total |
|-------|---------|-------------------------------------------------------|----|-------|
|       |         | 0                                                     | 1  |       |
| Age   | < = MED | 67                                                    | 36 | 103   |
|       | >MED    | 72                                                    | 25 | 97    |
| Total |         | 139                                                   | 61 | 200   |



### Chi-Square Tests

|                                    | Value              | df | Asymptotic<br>Significance (2-<br>sided) | Exact Sig. (2-<br>sided) | Exact Sig. (1-<br>sided) |
|------------------------------------|--------------------|----|------------------------------------------|--------------------------|--------------------------|
| Pearson Chi-Square                 | 1,985 <sup>a</sup> | 1  | 0,159                                    |                          |                          |
| Continuity Correction <sup>b</sup> | 1,576              | 1  | 0,209                                    |                          |                          |
| Likelihood Ratio                   | 1,994              | 1  | 0,158                                    |                          |                          |
| Fisher's Exact Test                |                    |    |                                          | 0,170                    | 0,105                    |
| Linear-by-Linear Association       | 1,975              | 1  | 0,160                                    |                          |                          |
| N of Valid Cases                   | 200                |    |                                          |                          |                          |

a. 0 cells (0,0%) have expected count less than 5. The minimum expected count is 29,59.

b. Computed only for a 2x2 table

### Count

|       |        | Typesurgery       |                 |               |                     |                        |                    |                       |       |       |
|-------|--------|-------------------|-----------------|---------------|---------------------|------------------------|--------------------|-----------------------|-------|-------|
|       |        | pneumone<br>ctomy | bilobecto<br>my | lobecto<br>my | sleeve<br>resection | segmental<br>resection | wedge<br>resection | extended<br>resection | other | Total |
| Age   | <= MED | 7                 | 8               | 62            | 2                   | 3                      | 5                  | 4                     | 1     | 92    |
|       | >MED   | 4                 | 2               | 67            | 0                   | 2                      | 9                  | 2                     | 0     | 86    |
| Total |        | 11                | 10              | 129           | 2                   | 5                      | 14                 | 6                     | 1     | 178   |

### Chi-Square Tests

|                              | Value              | df | Asymptotic<br>Significance (2-<br>sided) |
|------------------------------|--------------------|----|------------------------------------------|
| Pearson Chi-Square           | 9,430 <sup>a</sup> | 7  | 0,223                                    |
| Likelihood Ratio             | 10,874             | 7  | 0,144                                    |
| Linear-by-Linear Association | 0,245              | 1  | 0,620                                    |
| N of Valid Cases             | 178                |    |                                          |

a. 9 cells (56,3%) have expected count less than 5. The minimum expected count is 0,48.

## 2. TUMOR LOCATION: PERIPHERAL VERSUS CENTRAL

### Case Processing Summary

|                                                                                                            | Cases |         |         |         | Total |         |
|------------------------------------------------------------------------------------------------------------|-------|---------|---------|---------|-------|---------|
|                                                                                                            | Valid |         | Missing |         | N     | Percent |
|                                                                                                            | N     | Percent | N       | Percent |       |         |
| Central 1 vs Periferic 0 primary lesion *<br>Smoke yes 1 no 0                                              | 246   | 82,0 %  | 54      | 18,0 %  | 300   | 100,0 % |
| Central 1 vs Periferic 0 primary lesion * 18<br>FDG PET scan Not done Positive 1<br>Negative 0             | 200   | 66,7 %  | 100     | 33,3 %  | 300   | 100,0 % |
| Central 1 vs Periferic 0 primary lesion *<br>Octreoscan/68Gallium PET Not done NA<br>Positive 1 Negative 0 | 64    | 21,3 %  | 236     | 78,7 %  | 300   | 100,0 % |
| Central 1 vs Periferic 0 primary lesion *<br>Tcat                                                          | 276   | 92,0 %  | 24      | 8,0 %   | 300   | 100,0 % |
| Central 1 vs Periferic 0 primary lesion *<br>Npos1neg0                                                     | 265   | 88,3 %  | 35      | 11,7 %  | 300   | 100,0 % |
| Central 1 vs Periferic 0 primary lesion *<br>Stage                                                         | 274   | 91,3 %  | 26      | 8,7 %   | 300   | 100,0 % |
| Central 1 vs Periferic 0 primary lesion *<br>Ki67                                                          | 231   | 77,0 %  | 69      | 23,0 %  | 300   | 100,0 % |
| Central 1 vs Periferic 0 primary lesion *<br>Necrosis Not done NA<br>Positive 1 Negative 0                 | 293   | 97,7 %  | 7       | 2,3 %   | 300   | 100,0 % |
| Central 1 vs Periferic 0 primary lesion *<br>Diagnosis Typical carcinoid 0 Atypical<br>carcinoid 1         | 298   | 99,3 %  | 2       | 0,7 %   | 300   | 100,0 % |
| Central 1 vs Periferic 0 primary lesion *<br>Typesurgery                                                   | 276   | 92,0 %  | 24      | 8,0 %   | 300   | 100,0 % |
| Central 1 vs Periferic 0 primary lesion * Age                                                              | 200   | 66,7 %  | 100     | 33,3 %  | 300   | 100,0 % |

Crosstab

Count

|                                         |   | Smoke yes 1 no 0 |     | Total |
|-----------------------------------------|---|------------------|-----|-------|
|                                         |   | 0                | 1   |       |
| Central 1 vs Periferic 0 primary lesion | 0 | 65               | 37  | 102   |
|                                         | 1 | 77               | 67  | 144   |
| Total                                   |   | 142              | 104 | 246   |

Chi-Square Tests

|                                    | Value              | df | Asymptotic Significance (2-sided) | Exact Sig. (2-sided) | Exact Sig. (1-sided) |
|------------------------------------|--------------------|----|-----------------------------------|----------------------|----------------------|
| Pearson Chi-Square                 | 2,572 <sup>a</sup> | 1  | 0,109                             |                      |                      |
| Continuity Correction <sup>b</sup> | 2,169              | 1  | 0,141                             |                      |                      |
| Likelihood Ratio                   | 2,587              | 1  | 0,108                             |                      |                      |
| Fisher's Exact Test                |                    |    |                                   | 0,118                | 0,070                |
| Linear-by-Linear Association       | 2,562              | 1  | 0,109                             |                      |                      |
| N of Valid Cases                   | 246                |    |                                   |                      |                      |

a. 0 cells (0,0%) have expected count less than 5. The minimum expected count is 43,12.

b. Computed only for a 2x2 table

Crosstab

Count

|                                         |   | 18 FDG PET scan Not done |            | Total |
|-----------------------------------------|---|--------------------------|------------|-------|
|                                         |   | Positive 1               | Negative 0 |       |
| Central 1 vs Periferic 0 primary lesion | 0 | 21                       | 62         | 83    |
|                                         | 1 | 51                       | 66         | 117   |
| Total                                   |   | 72                       | 128        | 200   |

**Chi-Square Tests**

|                                          | <b>Value</b>             | <b>df</b> | <b>Asymptotic<br/>Significance (2-<br/>sided)</b> | <b>Exact Sig.<br/>(2-sided)</b> | <b>Exact Sig.<br/>(1-sided)</b> |
|------------------------------------------|--------------------------|-----------|---------------------------------------------------|---------------------------------|---------------------------------|
| <b>Pearson Chi-Square</b>                | <b>7,049<sup>a</sup></b> | <b>1</b>  | <b>0,008</b>                                      |                                 |                                 |
| <b>Continuity Correction<sup>b</sup></b> | <b>6,277</b>             | <b>1</b>  | <b>0,012</b>                                      |                                 |                                 |
| <b>Likelihood Ratio</b>                  | <b>7,206</b>             | <b>1</b>  | <b>0,007</b>                                      |                                 |                                 |
| <b>Fisher's Exact Test</b>               |                          |           |                                                   | <b>0,011</b>                    | <b>0,006</b>                    |
| <b>Linear-by-Linear Association</b>      | <b>7,013</b>             | <b>1</b>  | <b>0,008</b>                                      |                                 |                                 |
| <b>N of Valid Cases</b>                  | <b>200</b>               |           |                                                   |                                 |                                 |

a. 0 cells (0,0%) have expected count less than 5. The minimum expected count is 29,88.

b. Computed only for a 2x2 table

**Count**

|                                                    |          | <b>Octreoscan/68GalliumPET Not<br/>done NA Positive 1 Negative 0</b> |           | <b>Total</b> |
|----------------------------------------------------|----------|----------------------------------------------------------------------|-----------|--------------|
|                                                    |          | <b>0</b>                                                             | <b>1</b>  |              |
| <b>Central 1 vs Periferic 0<br/>primary lesion</b> | <b>0</b> | <b>9</b>                                                             | <b>13</b> | <b>22</b>    |
|                                                    | <b>1</b> | <b>13</b>                                                            | <b>29</b> | <b>42</b>    |
| <b>Total</b>                                       |          | <b>22</b>                                                            | <b>42</b> | <b>64</b>    |

### Chi-Square Tests

|                                          | Value                    | df       | Asymptotic<br>Significance (2-<br>sided) | Exact Sig.<br>(2-sided) | Exact<br>Sig. (1-<br>sided) |
|------------------------------------------|--------------------------|----------|------------------------------------------|-------------------------|-----------------------------|
| <b>Pearson Chi-Square</b>                | <b>0,634<sup>a</sup></b> | <b>1</b> | <b>0,426</b>                             |                         |                             |
| <b>Continuity Correction<sup>b</sup></b> | <b>0,270</b>             | <b>1</b> | <b>0,603</b>                             |                         |                             |
| <b>Likelihood Ratio</b>                  | <b>0,627</b>             | <b>1</b> | <b>0,428</b>                             |                         |                             |
| <b>Fisher's Exact Test</b>               |                          |          |                                          | <b>0,580</b>            | <b>0,300</b>                |
| <b>Linear-by-Linear Association</b>      | <b>0,625</b>             | <b>1</b> | <b>0,429</b>                             |                         |                             |
| <b>N of Valid Cases</b>                  | <b>64</b>                |          |                                          |                         |                             |

a. 0 cells (0,0%) have expected count less than 5. The minimum expected count is 7,56.

b. Computed only for a 2x2 table

### Crosstab

#### Count

|                                                    |          | Tcat       |           |           |          | Total      |
|----------------------------------------------------|----------|------------|-----------|-----------|----------|------------|
|                                                    |          | 1          | 2         | 3         | 4        |            |
| <b>Central 1 vs Periferic 0<br/>primary lesion</b> | <b>0</b> | <b>72</b>  | <b>22</b> | <b>7</b>  | <b>2</b> | <b>103</b> |
|                                                    | <b>1</b> | <b>103</b> | <b>56</b> | <b>9</b>  | <b>5</b> | <b>173</b> |
| <b>Total</b>                                       |          | <b>175</b> | <b>78</b> | <b>16</b> | <b>7</b> | <b>276</b> |

**Chi-Square Tests**

|                                     | <b>Value</b>             | <b>df</b> | <b>Asymptotic<br/>Significance (2-<br/>sided)</b> |
|-------------------------------------|--------------------------|-----------|---------------------------------------------------|
| <b>Pearson Chi-Square</b>           | <b>4,375<sup>a</sup></b> | <b>3</b>  | <b>0,224</b>                                      |
| <b>Likelihood Ratio</b>             | <b>4,480</b>             | <b>3</b>  | <b>0,214</b>                                      |
| <b>Linear-by-Linear Association</b> | <b>1,415</b>             | <b>1</b>  | <b>0,234</b>                                      |
| <b>N of Valid Cases</b>             | <b>276</b>               |           |                                                   |

a. 2 cells (25,0%) have expected count less than 5. The minimum expected count is 2,61.

**Crosstab**

**Count**

|                                                    |          | <b>Npos1neg0</b> |           |              |
|----------------------------------------------------|----------|------------------|-----------|--------------|
|                                                    |          | <b>0</b>         | <b>1</b>  | <b>Total</b> |
| <b>Central 1 vs Periferic 0<br/>primary lesion</b> | <b>0</b> | <b>70</b>        | <b>27</b> | <b>97</b>    |
|                                                    | <b>1</b> | <b>130</b>       | <b>38</b> | <b>168</b>   |
| <b>Total</b>                                       |          | <b>200</b>       | <b>65</b> | <b>265</b>   |

**Chi-Square Tests**

|                                              | <b>Value</b>             | <b>df</b> | <b>Asymptotic<br/>Significance (2-<br/>sided)</b> | <b>Exact Sig.<br/>(2-sided)</b> | <b>Exact Sig.<br/>(1-sided)</b> |
|----------------------------------------------|--------------------------|-----------|---------------------------------------------------|---------------------------------|---------------------------------|
| <b>Pearson Chi-Square</b>                    | <b>0,904<sup>a</sup></b> | <b>1</b>  | <b>0,342</b>                                      |                                 |                                 |
| <b>Continuity<br/>Correction<sup>b</sup></b> | <b>0,644</b>             | <b>1</b>  | <b>0,422</b>                                      |                                 |                                 |
| <b>Likelihood Ratio</b>                      | <b>0,894</b>             | <b>1</b>  | <b>0,344</b>                                      |                                 |                                 |
| <b>Fisher's Exact Test</b>                   |                          |           |                                                   | <b>0,375</b>                    | <b>0,210</b>                    |
| <b>Linear-by-Linear<br/>Association</b>      | <b>0,900</b>             | <b>1</b>  | <b>0,343</b>                                      |                                 |                                 |
| <b>N of Valid Cases</b>                      | <b>265</b>               |           |                                                   |                                 |                                 |

a. 0 cells (0,0%) have expected count less than 5. The minimum expected count is 23,79.

b. Computed only for a 2x2 table

**Crosstab**

**Count**

|                                                    |          | <b>Stage</b> |           |           |           | <b>Total</b> |
|----------------------------------------------------|----------|--------------|-----------|-----------|-----------|--------------|
|                                                    |          | <b>1</b>     | <b>2</b>  | <b>3</b>  | <b>4</b>  |              |
| <b>Central 1 vs Periferic 0<br/>primary lesion</b> | <b>0</b> | <b>62</b>    | <b>21</b> | <b>10</b> | <b>6</b>  | <b>99</b>    |
|                                                    | <b>1</b> | <b>108</b>   | <b>49</b> | <b>12</b> | <b>6</b>  | <b>175</b>   |
| <b>Total</b>                                       |          | <b>170</b>   | <b>70</b> | <b>22</b> | <b>12</b> | <b>274</b>   |

### Chi-Square Tests

|                              | Value              | df | Asymptotic Significance (2-sided) |
|------------------------------|--------------------|----|-----------------------------------|
| Pearson Chi-Square           | 2,978 <sup>a</sup> | 3  | 0,395                             |
| Likelihood Ratio             | 2,946              | 3  | 0,400                             |
| Linear-by-Linear Association | 0,542              | 1  | 0,462                             |
| N of Valid Cases             | 274                |    |                                   |

a. 1 cells (12,5%) have expected count less than 5. The minimum expected count is 4,34.

### Crosstab

#### Count

|                                            |   | Ki67 |    |   | Total |
|--------------------------------------------|---|------|----|---|-------|
|                                            |   | 1    | 2  | 3 |       |
| Central 1 vs Periferic<br>0 primary lesion | 0 | 59   | 23 | 2 | 84    |
|                                            | 1 | 83   | 57 | 7 | 147   |
| Total                                      |   | 142  | 80 | 9 | 231   |

### Chi-Square Tests

|                              | Value              | df | Asymptotic Significance (2-sided) |
|------------------------------|--------------------|----|-----------------------------------|
| Pearson Chi-Square           | 4,432 <sup>a</sup> | 2  | 0,109                             |
| Likelihood Ratio             | 4,536              | 2  | 0,104                             |
| Linear-by-Linear Association | 4,312              | 1  | 0,038                             |
| N of Valid Cases             | 231                |    |                                   |

a. 1 cells (16,7%) have expected count less than 5. The minimum expected count is 3,27.



Crosstab

Count

|                                         |   | Necrosis Not done NA Positive 1 |    | Total |
|-----------------------------------------|---|---------------------------------|----|-------|
|                                         |   | Negative 0                      | 1  |       |
| Central 1 vs Periferic 0 primary lesion | 0 | 97                              | 12 | 109   |
|                                         | 1 | 157                             | 27 | 184   |
| Total                                   |   | 254                             | 39 | 293   |

Chi-Square Tests

|                                    | Value              | df | Asymptotic Significance (2-sided) | Exact Sig. (2-sided) | Exact Sig. (1-sided) |
|------------------------------------|--------------------|----|-----------------------------------|----------------------|----------------------|
| Pearson Chi-Square                 | 0,797 <sup>a</sup> | 1  | 0,372                             |                      |                      |
| Continuity Correction <sup>b</sup> | 0,511              | 1  | 0,475                             |                      |                      |
| Likelihood Ratio                   | 0,815              | 1  | 0,367                             |                      |                      |
| Fisher's Exact Test                |                    |    |                                   | 0,477                | 0,239                |
| Linear-by-Linear Association       | 0,794              | 1  | 0,373                             |                      |                      |
| N of Valid Cases                   | 293                |    |                                   |                      |                      |

a. 0 cells (0,0%) have expected count less than 5. The minimum expected count is 14,51.

b. Computed only for a 2x2 table

Crosstab

Count

|                                         |   | Diagnosis Typical carcinoid 0 |    | Total |
|-----------------------------------------|---|-------------------------------|----|-------|
|                                         |   | Atypical carcinoid 1          | 1  |       |
| Central 1 vs Periferic 0 primary lesion | 0 | 87                            | 25 | 112   |
|                                         | 1 | 136                           | 50 | 186   |
| Total                                   |   | 223                           | 75 | 298   |

**Chi-Square Tests**

|                                          | <b>Value</b>             | <b>df</b> | <b>Asymptotic<br/>Significance (2-<br/>sided)</b> | <b>Exact Sig.<br/>(2-sided)</b> | <b>Exact Sig.<br/>(1-sided)</b> |
|------------------------------------------|--------------------------|-----------|---------------------------------------------------|---------------------------------|---------------------------------|
| <b>Pearson Chi-Square</b>                | <b>0,772<sup>a</sup></b> | <b>1</b>  | <b>0,380</b>                                      |                                 |                                 |
| <b>Continuity Correction<sup>b</sup></b> | <b>0,549</b>             | <b>1</b>  | <b>0,459</b>                                      |                                 |                                 |
| <b>Likelihood Ratio</b>                  | <b>0,781</b>             | <b>1</b>  | <b>0,377</b>                                      |                                 |                                 |
| <b>Fisher's Exact Test</b>               |                          |           |                                                   | <b>0,411</b>                    | <b>0,230</b>                    |
| <b>Linear-by-Linear Association</b>      | <b>0,769</b>             | <b>1</b>  | <b>0,380</b>                                      |                                 |                                 |
| <b>N of Valid Cases</b>                  | <b>298</b>               |           |                                                   |                                 |                                 |

a. 0 cells (0,0%) have expected count less than 5. The minimum expected count is 28,19.

b. Computed only for a 2x2 table

### 3. NECROSIS

#### Case Processing Summary

|                                                                                                         | Cases |         |         |         | Total |         |
|---------------------------------------------------------------------------------------------------------|-------|---------|---------|---------|-------|---------|
|                                                                                                         | Valid |         | Missing |         | N     | Percent |
|                                                                                                         | N     | Percent | N       | Percent |       |         |
| Necrosis Not done NA Positive 1 Negative 0 * Smoke yes 1 no 0                                           | 245   | 81,7%   | 55      | 18,3%   | 300   | 100,0%  |
| Necrosis Not done NA Positive 1 Negative 0 * 18 FDG PET scan Not done Positive 1 Negative 0             | 198   | 66,0%   | 102     | 34,0%   | 300   | 100,0%  |
| Necrosis Not done NA Positive 1 Negative 0 * Octreoscan/68Ga IliumPET Not done NA Positive 1 Negative 0 | 64    | 21,3%   | 236     | 78,7%   | 300   | 100,0%  |
| Necrosis Not done NA Positive 1 Negative 0 * Tcat                                                       | 274   | 91,3%   | 26      | 8,7%    | 300   | 100,0%  |
| Necrosis Not done NA Positive 1 Negative 0 * NposIneg0                                                  | 264   | 88,0%   | 36      | 12,0%   | 300   | 100,0%  |
| Necrosis Not done NA Positive 1 Negative 0 * Stage at diagnosis                                         | 295   | 98,3%   | 5       | 1,7%    | 300   | 100,0%  |
| Necrosis Not done NA Positive 1 Negative 0 * Gruppoki67                                                 | 229   | 76,3%   | 71      | 23,7%   | 300   | 100,0%  |

**Crosstab**

**Count**

|                       |   | Smoke yes 1 no 0 |            | Total      |
|-----------------------|---|------------------|------------|------------|
|                       |   | 0                | 1          |            |
| Necrosis Not done NA  | 0 | 126              | 81         | 207        |
| Positive 1 Negative 0 | 1 | 16               | 22         | 38         |
| <b>Total</b>          |   | <b>142</b>       | <b>103</b> | <b>245</b> |

**Chi-Square Tests**

|                                    | Value              | df | Asymptotic Significance (2-sided) | Exact Sig. (2-sided) | Exact Sig. (1-sided) |
|------------------------------------|--------------------|----|-----------------------------------|----------------------|----------------------|
| Pearson Chi-Square                 | 4,639 <sup>a</sup> | 1  | 0,031                             |                      |                      |
| Continuity Correction <sup>b</sup> | 3,901              | 1  | 0,048                             |                      |                      |
| Likelihood Ratio                   | 4,578              | 1  | 0,032                             |                      |                      |
| Fisher's Exact Test                |                    |    |                                   | 0,048                | 0,025                |
| Linear-by-Linear Association       | 4,620              | 1  | 0,032                             |                      |                      |
| N of Valid Cases                   | 245                |    |                                   |                      |                      |

a. 0 cells (0,0%) have expected count less than 5. The minimum expected count is 15,98.

b. Computed only for a 2x2 table

**Crosstab**

**Count**

|                       |   | 18 FDG PET scan Not done |            | Total      |
|-----------------------|---|--------------------------|------------|------------|
|                       |   | Positive 1 Negative 0    | 0          |            |
| Necrosis Not done NA  | 0 | 56                       | 116        | 172        |
| Positive 1 Negative 0 | 1 | 12                       | 14         | 26         |
| <b>Total</b>          |   | <b>68</b>                | <b>130</b> | <b>198</b> |

**Chi-Square Tests**

|                                          | <b>Value</b>             | <b>df</b> | <b>Asymptotic<br/>Significance<br/>(2-sided)</b> | <b>Exact<br/>Sig.<br/>(2-<br/>sided)</b> | <b>Exact<br/>Sig.<br/>(1-<br/>sided)</b> |
|------------------------------------------|--------------------------|-----------|--------------------------------------------------|------------------------------------------|------------------------------------------|
| <b>Pearson Chi-Square</b>                | <b>1,851<sup>a</sup></b> | <b>1</b>  | <b>0,174</b>                                     |                                          |                                          |
| <b>Continuity Correction<sup>b</sup></b> | <b>1,298</b>             | <b>1</b>  | <b>0,255</b>                                     |                                          |                                          |
| <b>Likelihood Ratio</b>                  | <b>1,786</b>             | <b>1</b>  | <b>0,181</b>                                     |                                          |                                          |
| <b>Fisher's Exact Test</b>               |                          |           |                                                  | <b>0,189</b>                             | <b>0,128</b>                             |
| <b>Linear-by-Linear Association</b>      | <b>1,842</b>             | <b>1</b>  | <b>0,175</b>                                     |                                          |                                          |
| <b>N of Valid Cases</b>                  | <b>198</b>               |           |                                                  |                                          |                                          |

a. 0 cells (0,0%) have expected count less than 5. The minimum expected count is 8,93.

b. Computed only for a 2x2 table

**Crosstab**

**Count**

|                              |          | <b>Octreoscan/68GalliumPET Not done NA</b> |                   | <b>Total</b> |
|------------------------------|----------|--------------------------------------------|-------------------|--------------|
|                              |          | <b>Positive 0</b>                          | <b>Negative 1</b> |              |
| <b>Necrosis Not done NA</b>  | <b>0</b> | <b>18</b>                                  | <b>32</b>         | <b>50</b>    |
| <b>Positive 1 Negative 0</b> | <b>1</b> | <b>4</b>                                   | <b>10</b>         | <b>14</b>    |
| <b>Total</b>                 |          | <b>22</b>                                  | <b>42</b>         | <b>64</b>    |

### Chi-Square Tests

|                                    | Value              | df | Asymptotic Significance (2-sided) | Exact Sig. (2-sided) | Exact Sig. (1-sided) |
|------------------------------------|--------------------|----|-----------------------------------|----------------------|----------------------|
| Pearson Chi-Square                 | 0,268 <sup>a</sup> | 1  | 0,605                             |                      |                      |
| Continuity Correction <sup>b</sup> | 0,040              | 1  | 0,842                             |                      |                      |
| Likelihood Ratio                   | 0,274              | 1  | 0,601                             |                      |                      |
| Fisher's Exact Test                |                    |    |                                   | 0,755                | 0,429                |
| Linear-by-Linear Association       | 0,263              | 1  | 0,608                             |                      |                      |
| N of Valid Cases                   | 64                 |    |                                   |                      |                      |

a. 1 cells (25,0%) have expected count less than 5. The minimum expected count is 4,81.

b. Computed only for a 2x2 table

### Crosstab

#### Count

|                       |   | Tcat       |           |           |          | Total      |
|-----------------------|---|------------|-----------|-----------|----------|------------|
|                       |   | 1          | 2         | 3         | 4        |            |
| Necrosis Not done NA  | 0 | 168        | 56        | 9         | 3        | 236        |
| Positive 1 Negative 0 | 1 | 7          | 20        | 7         | 4        | 38         |
| <b>Total</b>          |   | <b>175</b> | <b>76</b> | <b>16</b> | <b>7</b> | <b>274</b> |

### Chi-Square Tests

|                              | Value               | df | Asymptotic Significance (2-sided) |
|------------------------------|---------------------|----|-----------------------------------|
| Pearson Chi-Square           | 47,059 <sup>a</sup> | 3  | 0,000                             |
| Likelihood Ratio             | 42,735              | 3  | 0,000                             |
| Linear-by-Linear Association | 46,326              | 1  | 0,000                             |
| N of Valid Cases             | 274                 |    |                                   |

a. 2 cells (25,0%) have expected count less than 5. The minimum expected count is ,97.

**Crosstab**

**Count**

|                       |   | Npos1neg0  |           | Total      |
|-----------------------|---|------------|-----------|------------|
|                       |   | 0          | 1         |            |
| Necrosis Not done NA  | 0 | 180        | 47        | 227        |
| Positive 1 Negative 0 | 1 | 19         | 18        | 37         |
| <b>Total</b>          |   | <b>199</b> | <b>65</b> | <b>264</b> |

**Chi-Square Tests**

|                                    | Value               | df | Asymptotic<br>Significance<br>(2-sided) | Exact<br>Sig.<br>(2-<br>sided) | Exact<br>Sig.<br>(1-<br>sided) |
|------------------------------------|---------------------|----|-----------------------------------------|--------------------------------|--------------------------------|
| Pearson Chi-Square                 | 13,386 <sup>a</sup> | 1  | ,000                                    |                                |                                |
| Continuity Correction <sup>b</sup> | 11,922              | 1  | ,001                                    |                                |                                |
| Likelihood Ratio                   | 11,881              | 1  | ,001                                    |                                |                                |
| Fisher's Exact Test                |                     |    |                                         | ,001                           | ,001                           |
| Linear-by-Linear Association       | 13,335              | 1  | ,000                                    |                                |                                |
| N of Valid Cases                   | 264                 |    |                                         |                                |                                |

a. 0 cells (0,0%) have expected count less than 5. The minimum expected count is 9,11.

b. Computed only for a 2x2 table

**Crosstab**

**Count**

|                       |   | Gruppoki67 |           |          | Total      |
|-----------------------|---|------------|-----------|----------|------------|
|                       |   | 1          | 2         | 3        |            |
| Necrosis Not done NA  | 0 | 135        | 54        | 5        | 194        |
| Positive 1 Negative 0 | 1 | 7          | 25        | 3        | 35         |
| <b>Total</b>          |   | <b>142</b> | <b>79</b> | <b>8</b> | <b>229</b> |

Chi-Square Tests

|                              | Value               | df | Asymptotic<br>Significance (2-<br>sided) |
|------------------------------|---------------------|----|------------------------------------------|
| Pearson Chi-Square           | 31,141 <sup>a</sup> | 2  | ,000                                     |
| Likelihood Ratio             | 30,850              | 2  | ,000                                     |
| Linear-by-Linear Association | 29,173              | 1  | ,000                                     |
| N of Valid Cases             | 229                 |    |                                          |

a. 1 cells (16,7%) have expected count less than 5. The minimum expected count is 1,22.

Crosstab

Count

|                                               |   | Diagnosis Typical carcinoid 0<br>Atypical carcinoid 1 |    | Total |
|-----------------------------------------------|---|-------------------------------------------------------|----|-------|
|                                               |   | 0                                                     | 1  |       |
| Necrosis Not done NA<br>Positive 1 Negative 0 | 0 | 225                                                   | 31 | 256   |
|                                               | 1 | 0                                                     | 39 | 39    |
| Total                                         |   | 225                                                   | 70 | 295   |

Chi-Square Tests

|                                       | Value                | df | Asymptotic<br>Significance<br>(2-sided) | Exact<br>Sig.<br>(2-<br>sided) | Exact<br>Sig. (1-<br>sided) |
|---------------------------------------|----------------------|----|-----------------------------------------|--------------------------------|-----------------------------|
| Pearson<br>Chi-Square                 | 144,455 <sup>a</sup> | 1  | 0,000                                   |                                |                             |
| Continuity<br>Correction <sup>b</sup> | 139,639              | 1  | 0,000                                   |                                |                             |
| Likelihood<br>Ratio                   | 134,302              | 1  | 0,000                                   |                                |                             |
| Fisher's<br>Exact Test                |                      |    |                                         | 0,000                          | 0,000                       |
| Linear-by-<br>Linear<br>Association   | 143,965              | 1  | 0,000                                   |                                |                             |
| N of Valid<br>Cases                   | 295                  |    |                                         |                                |                             |

a. 0 cells (0,0%) have expected count less than 5. The minimum expected count is 9,25.

b. Computed only for a 2x2 table



**Kaplan-Meier survival curves of: high mitotic count (> 10 per 10 HPF) versus mitotic count ≤ than 10 per 10 HPF in terms of PFS and OS (upper part of the figure, left and right side, respectively); and of high Ki67 value (> 20%) versus Ki67 lower than 20% in terms of both PFS and OS (lower part of the figure, left and right side, respectively). P-values have been considered as significant if < 0.05 and are reported according to the corresponding univariant COX regression analysis.**

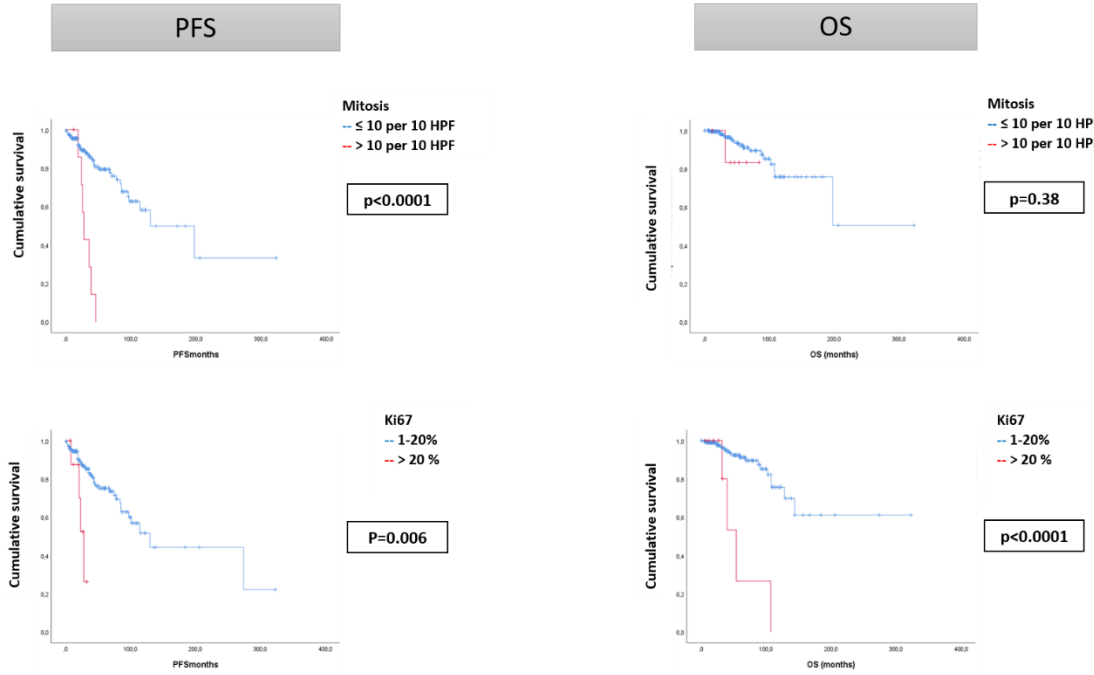

Supplement: MOESM1 [file 20232778]
